# Supplementary material for: Synergistic action of the transcription factors Krüppel homolog 1 and Hairy in juvenile hormone/Methoprene-tolerant-mediated gene-repression in the mosquito Aedes aegypti
Source: PLoS Genet. 2019 Oct 29;15(10):e1008443. doi: 10.1371/journal.pgen.1008443 (PMC6818763; doi:10.1371/journal.pgen.1008443)
Supplement: S1 Table — (XLSX) [file pgen.1008443.s010.xlsx]

## Sheet: Sheet1
Transcript_ID	Functional Description	Category	Log(iKr-h1.1/iLuc.1, 2)	Log(iMet/iLuc, 2)	Log(iHairy/iLuc, 2)
AAEL006576-RA			1.63276	4.1221	1.51974
AAEL006576-RB			1.63573	4.11206	1.51205
AAEL014005-RA			1.64955	4.13095	1.57344
AAEL001964-RA	Protein serine/threonine kinase	S	1.07534	3.6049	1.87
AAEL002610-RA	Serine-Type endopeptidase	O	2.0731	3.87602	1.65892
AAEL014078-RA	Serine protease inhibitor	V	1.20948	2.47147	1.03084
AAEL005673-RA	Serine protease inhibitor	V	1.20188	2.46364	1.0227
AAEL006585-RA			3.17923	6.76016	2.92024
AAEL001794-RA	Containing protein	O	2.20833	2.33083	1.10442
AAEL017144-RA			2.70578	4.4084	2.20628
AAEL001794-RB	Containing protein	O	2.20203	2.32333	1.10213
AAEL015458-RA	Transferrin protein	P	1.74018	3.10174	1.11333
AAEL801283-RA			1.8031	3.26015	1.76587
AAEL801284-RA			1.72655	2.44501	1.32569
AAEL014004-RA			3.1996	6.74778	2.91964
AAEL001802-RA	Containing protein	O	2.23005	2.33052	1.12641
AAEL003686-RA			1.1326	2.1095	1.05139
AAEL017023-RA			1.80799	2.61733	1.33463
AAEL017023-RB			1.80668	2.61583	1.33496
AAEL014980-RA	Serine protease inhibitor	V	1.12156	2.0906	1.0484
AAEL008473-RA		S	2.03716	3.68492	1.72279
AAEL015639-RA	Transferrin protein	P	1.75275	3.11423	1.12924
AAEL003619-RA	Dependent amino acid transporter protein	P	2.23809	7.16004	4.45432
AAEL003619-RB	Dependent amino acid transporter protein	P	2.25231	7.1639	4.46305
AAEL008274-RA		S	1.11855	2.67774	1.28619
AAEL017345-RA			1.56086	2.75831	1.49047
AAEL007371-RA			1.34788	2.95679	1.16343
AAEL008106-RA			2.13961	3.83882	1.71861
AAEL002406-RA		S	3.14009	4.30773	2.75153
AAEL013984-RA			1.17374	1.85798	1.04062
AAEL000059-RA			1.59304	2.54858	1.02322
AAEL002624-RA	Serine-Type endopeptidase	O	1.73923	3.03954	1.07335
AAEL004809-RA			1.16847	3.24338	1.50513
AAEL002301-RA	Serine-Type endopeptidase	O	1.26544	1.74664	1.03851
AAEL013895-RA			1.16795	3.22041	1.49233
AAEL012505-RA	Protein involved in protein import	S	2.04729	2.16461	2.756
AAEL002601-RA	Serine-Type endopeptidase	O	1.23401	2.48824	1.28805
AAEL002559-RA	Protein involved in superoxide metabolic process	S	2.51217	3.03631	1.29392
AAEL005004-RA			1.86434	4.54147	2.09055
AAEL002585-RA	Serine-Type endopeptidase	O	1.7496	3.34784	1.23361
AAEL015527-RA			1.44475	2.82012	1.14781
AAEL002580-RA			1.22523	2.43225	1.19481
AAEL000019-RA			1.40708	4.72716	1.86966
AAEL009423-RA	Protein involved in biological adhesion	T	1.00845	2.68853	1.24362
AAEL000087-RA	Containing protein	O	1.99638	2.33585	1.93876
AAEL005482-RA	C-Type lectin protein	V	1.01739	2.225	1.92153
AAEL017132-RA			1.21412	3.86289	1.41683
AAEL007107-RA			1.4495	2.83458	1.14827
AAEL017380-RA			3.79137	5.50554	4.20031
AAEL012571-RA		S	1.84652	1.75791	1.05806
AAEL003614-RA			2.08512	3.21169	1.28432
AAEL014909-RA		S	1.85162	1.74949	1.06371
AAEL003656-RA			1.7285	2.96892	1.73871
AAEL008753-RA			1.53848	1.16365	1.16349
AAEL012956-RA	Serine protease	O	1.78635	2.62698	1.67403
AAEL008757-RA	Carboxylesterase	R	2.1731	2.48944	1.28149
AAEL006518-RA	Protein involved in cytidine metabolic process	F	1.56136	2.75372	2.02736
AAEL001394-RA	Monooxygenase	E	1.2997	1.28587	1.40398
AAEL008646-RA	Fibrinogen and fibronectin protein	V	1.73067	3.18161	1.7319
AAEL003699-RA	Phospholipase C	S	1.88578	3.14602	1.67782
AAEL005748-RA	Serine protease	O	3.3002	3.96633	3.42219
AAEL006978-RA	Glutamine gamma-glutamyltransferase	O	1.58824	3.55465	1.77302
AAEL011884-RA			1.89124	3.75326	1.80809
AAEL002582-RA	Serine-Type endopeptidase	O	1.38932	2.20659	1.41857
AAEL002022-RA	Protein serine/threonine kinase	S	2.13676	6.91648	3.18079
AAEL010773-RA	Serine protease	O	1.65183	3.03439	1.09736
AAEL006662-RA			2.06574	2.18693	2.85016
AAEL015465-RA			2.06595	3.16981	1.22133
AAEL002582-RB	Serine-Type endopeptidase	O	1.37247	2.21891	1.40286
AAEL005093-RA			1.95263	3.08453	1.47284
AAEL007455-RA	Thrombospondin protein	W	1.11649	2.30669	1.04629
AAEL012353-RA	C-Type lectin protein	V	3.172	4.24178	1.84153
AAEL002655-RA	Matrix metalloproteinase	O	2.37337	4.75237	2.95338
AAEL000636-RA	Protein involved in phagocytosis	T	1.13487	3.02311	1.74919
AAEL010139-RA		T	4.53205	5.08818	6.24648
AAEL012506-RA			2.06575	2.16188	2.67053
AAEL003029-RA			2.96383	5.35887	2.71767
AAEL002969-RA	Chitinase	G	1.6777	1.99005	1.44295
AAEL005431-RA			3.13393	2.1221	1.18697
AAEL008080-RA			3.30331	3.66322	2.84871
AAEL011408-RA	C-Type lectin protein	V	1.03935	3.06676	1.03531
AAEL014390-RA	C-Type lectin protein	V	2.81082	2.967	1.41448
AAEL003114-RA			1.28294	3.18666	1.5038
AAEL014138-RA	Serine protease inhibitor	V	2.31351	2.46534	1.9016
AAEL006168-RA			1.24007	2.07677	1.2535
AAEL008404-RA	Serine-Type endopeptidase	O	1.79768	3.11163	1.29718
AAEL002481-RA	Chitin binding protein	S	1.04095	2.34345	1.58874
AAEL011453-RA	C-Type lectin protein	V	1.48308	2.299	2.0983
AAEL013262-RA			1.16872	2.5281	2.29518
AAEL014660-RA	Integrin alpha protein	W	1.96599	3.78192	2.37755
AAEL013245-RA	Serine protease	O	2.32291	3.23014	1.53396
AAEL003294-RA	Fibrinogen and fibronectin protein	V	1.86907	3.02247	2.21542
AAEL008050-RA			3.32743	5.16347	4.4437
AAEL014139-RA	Serine protease	O	1.24659	3.11713	1.51108
AAEL011610-RA	C-Type lectin protein	V	2.97691	3.2273	1.48365
AAEL007109-RA			1.12316	1.58662	1.19572
AAEL000374-RA			2.07283	4.82233	2.62668
AAEL014382-RA	C-Type lectin protein	V	2.25272	2.24017	1.16542
AAEL007969-RA			1.3305	2.15608	1.45535
AAEL003857-RA	Defensin, DEFD	V	3.43228	5.54086	5.72984
AAEL003841-RA	Defensin, DEFA	V	4.29306	5.57383	5.73703
AAEL003319-RA			1.40644	5.1206	1.96611
AAEL005641-RA	C-Type lectin protein	V	1.77525	3.66438	1.35253
AAEL012194-RA			2.41074	6.06157	3.86861
AAEL000543-RA	C-Type lectin protein	V	1.33412	1.6068	1.29499
AAEL005793-RA	Beta-Alanyl-Dopamine synthase	Q	1.57782	3.07982	1.82302
AAEL007969-RB			1.3344	2.16519	1.43934
AAEL012842-RA			1.85811	3.19747	1.41944
AAEL007992-RA	Serine protease	O	3.44768	3.15779	2.27513
AAEL008292-RA	Diuretic hormone receptor	T	1.33418	3.39253	2.72314
AAEL010980-RA	G-Protein coupled receptor	T	1.10826	2.42796	1.53043
AAEL011144-RA	Triacylglycerol lipase	I	1.31577	1.98174	1.28776
AAEL017003-RA			1.94259	2.36216	1.47912
AAEL017555-RA			1.92929	2.36017	1.47468
AAEL005194-RA	Fibrinogen and fibronectin protein	V	1.20638	2.41261	1.33252
AAEL017003-RB			1.91567	2.32418	1.45697
AAEL005792-RA			3.7214	4.38394	4.1664
AAEL017484-RA			1.17638	5.72788	3.07738
AAEL010099-RA			1.14189	1.34445	1.09406
AAEL003723-RA			1.20043	1.77405	1.14342
AAEL005800-RA			2.62247	3.20803	1.62365
AAEL008222-RA	Phospholipase A1	I	1.67537	1.71703	1.38027
AAEL014617-RA	Cytochrome P450 protein	Q	2.20371	2.00607	1.6187
AAEL009459-RA			1.36376	3.73296	2.3346
AAEL017046-RA			1.00664	2.08585	1.43314
AAEL006259-RA	Rhodopsin protein	T	2.10603	9.30823	3.77067
AAEL002492-RA			2.13904	4.61915	2.50518
AAEL005253-RA	ABC transporter protein	Q	1.88445	3.71585	1.41121
AAEL006723-RA		S	2.49065	2.95994	1.57568
AAEL011407-RA	C-Type lectin protein	V	2.4076	3.40965	1.07406
