# Supplementary material for: Synergistic action of the transcription factors Krüppel homolog 1 and Hairy in juvenile hormone/Methoprene-tolerant-mediated gene-repression in the mosquito Aedes aegypti
Source: PLoS Genet. 2019 Oct 29;15(10):e1008443. doi: 10.1371/journal.pgen.1008443 (PMC6818763; doi:10.1371/journal.pgen.1008443)
Supplement: S3 Dataset — The list shows the three way overlap between upregulated transcripts in three different RNA-seq libraries prepared from iMet, iHairy and iKr-h1 adult female mosquito fat body. (XLSX) [file pgen.1008443.s009.xlsx]

## Sheet: iKR_UP
Transcript_ID	Log(iKr-h1.1/iLuc.1, 2)	Log(iMet/iLuc, 2)	Log(iHairy/iLuc, 2)
AAEL006576-RA	1.63276	4.1221	1.51974
AAEL006576-RB	1.63573	4.11206	1.51205
AAEL014005-RA	1.64955	4.13095	1.57344
AAEL008607-RA	3.20226	3.23954	0.727677
AAEL014755-RA	3.31433	3.24194	0.744583
AAEL001964-RA	1.07534	3.6049	1.87
AAEL002610-RA	2.0731	3.87602	1.65892
AAEL014078-RA	1.20948	2.47147	1.03084
AAEL005673-RA	1.20188	2.46364	1.0227
AAEL014937-RA	4.73968	4.70342	0.894583
AAEL006585-RA	3.17923	6.76016	2.92024
AAEL001794-RA	2.20833	2.33083	1.10442
AAEL017144-RA	2.70578	4.4084	2.20628
AAEL002720-RA	3.14152	3.02582	0.976448
AAEL001794-RB	2.20203	2.32333	1.10213
AAEL015458-RA	1.74018	3.10174	1.11333
AAEL801283-RA	1.8031	3.26015	1.76587
AAEL801284-RA	1.72655	2.44501	1.32569
AAEL014004-RA	3.1996	6.74778	2.91964
AAEL001802-RA	2.23005	2.33052	1.12641
AAEL002595-RA	2.98803	2.81491	0.949237
AAEL003686-RA	1.1326	2.1095	1.05139
AAEL017023-RA	1.80799	2.61733	1.33463
AAEL017023-RB	1.80668	2.61583	1.33496
AAEL014980-RA	1.12156	2.0906	1.0484
AAEL008473-RA	2.03716	3.68492	1.72279
AAEL015639-RA	1.75275	3.11423	1.12924
AAEL001965-RA	1.04645	1.37722	0.577263
AAEL003619-RA	2.23809	7.16004	4.45432
AAEL003619-RB	2.25231	7.1639	4.46305
AAEL008274-RA	1.11855	2.67774	1.28619
AAEL017345-RA	1.56086	2.75831	1.49047
AAEL007371-RA	1.34788	2.95679	1.16343
AAEL008106-RA	2.13961	3.83882	1.71861
AAEL017536-RA	4.21937	3.39301	0.771276
AAEL003299-RA	4.35185	3.82068	0.816508
AAEL002406-RA	3.14009	4.30773	2.75153
AAEL013984-RA	1.17374	1.85798	1.04062
AAEL002593-RB	3.18687	3.00979	0.95688
AAEL002593-RA	3.18982	3.01264	0.959078
AAEL000074-RA	1.28324	1.94529	0.700605
AAEL010634-RA	1.00133	0.719006	0.645097
AAEL000059-RA	1.59304	2.54858	1.02322
AAEL008364-RA	1.02206	1.83451	0.414688
AAEL002624-RA	1.73923	3.03954	1.07335
AAEL004809-RA	1.16847	3.24338	1.50513
AAEL002301-RA	1.26544	1.74664	1.03851
AAEL013895-RA	1.16795	3.22041	1.49233
AAEL012505-RA	2.04729	2.16461	2.756
AAEL000037-RA	2.84615	2.73635	0.943638
AAEL002601-RA	1.23401	2.48824	1.28805
AAEL010867-RA	2.07396	2.11056	0.966124
AAEL008936-RA	3.00781	2.81324	0.516349
AAEL002559-RA	2.51217	3.03631	1.29392
AAEL005004-RA	1.86434	4.54147	2.09055
AAEL000834-RB	1.71189	1.68699	0.574383
AAEL000834-RA	1.71185	1.68426	0.571776
AAEL005769-RA	2.67603	2.69317	-0.167195
AAEL002585-RA	1.7496	3.34784	1.23361
AAEL015527-RA	1.44475	2.82012	1.14781
AAEL002580-RA	1.22523	2.43225	1.19481
AAEL017325-RA	1.24999	1.0965	0.705921
AAEL000019-RA	1.40708	4.72716	1.86966
AAEL009423-RA	1.00845	2.68853	1.24362
AAEL000087-RA	1.99638	2.33585	1.93876
AAEL005482-RA	1.01739	2.225	1.92153
AAEL005401-RB	1.08283	1.2263	0.414738
AAEL005401-RA	1.08305	1.22384	0.415005
AAEL017132-RA	1.21412	3.86289	1.41683
AAEL015430-RA	2.47837	2.45538	0.946558
AAEL007107-RA	1.4495	2.83458	1.14827
AAEL001892-RB	2.8198	2.57478	0.818119
AAEL017380-RA	3.79137	5.50554	4.20031
AAEL001508-RA	3.07526	2.82616	0.632064
AAEL012571-RA	1.84652	1.75791	1.05806
AAEL003614-RA	2.08512	3.21169	1.28432
AAEL014909-RA	1.85162	1.74949	1.06371
AAEL003656-RA	1.7285	2.96892	1.73871
AAEL008753-RA	1.53848	1.16365	1.16349
AAEL012956-RA	1.78635	2.62698	1.67403
AAEL004667-RA	3.71033	3.1638	0.662674
AAEL001271-RA	2.54783	2.1408	0.69077
AAEL008757-RA	2.1731	2.48944	1.28149
AAEL006518-RA	1.56136	2.75372	2.02736
AAEL001394-RA	1.2997	1.28587	1.40398
AAEL008646-RA	1.73067	3.18161	1.7319
AAEL003699-RA	1.88578	3.14602	1.67782
AAEL015404-RA	3.13977	2.97154	0.841248
AAEL005401-RC	1.07108	1.20497	0.410181
AAEL010100-RB	3.22847	2.98585	0.838566
AAEL001882-RA	2.89141	2.67332	0.310804
AAEL005748-RA	3.3002	3.96633	3.42219
AAEL006978-RA	1.58824	3.55465	1.77302
AAEL011622-RA	1.57663	1.64442	0.735424
AAEL011884-RA	1.89124	3.75326	1.80809
AAEL014914-RA	1.70818	1.76146	0.659495
AAEL012577-RA	1.71301	1.75981	0.655561
AAEL002582-RA	1.38932	2.20659	1.41857
AAEL002022-RA	2.13676	6.91648	3.18079
AAEL011460-RA	4.09412	4.08174	0.195986
AAEL005417-RA	1.03268	1.20922	0.589834
AAEL010773-RA	1.65183	3.03439	1.09736
AAEL006662-RA	2.06574	2.18693	2.85016
AAEL015465-RA	2.06595	3.16981	1.22133
AAEL004591-RC	1.57048	1.85206	-0.0835766
AAEL002582-RB	1.37247	2.21891	1.40286
AAEL007765-RB	1.13009	0.821976	0.178358
AAEL004591-RB	1.75958	1.94241	0.0103517
AAEL007765-RC	1.11242	0.824596	0.173629
AAEL007765-RA	1.15642	0.820417	0.17453
AAEL012534-RA	1.55017	1.81797	-0.131043
AAEL009726-RA	2.96699	2.32948	0.869025
AAEL006971-RA	4.16931	0.856393	3.19848
AAEL007765-RD	1.11517	0.806955	0.165231
AAEL005093-RA	1.95263	3.08453	1.47284
AAEL004156-RA	1.05898	1.20893	0.659678
AAEL001098-RA	2.92839	2.5781	-0.134044
AAEL007455-RA	1.11649	2.30669	1.04629
AAEL011007-RA	1.04789	1.21101	0.657616
AAEL012353-RA	3.172	4.24178	1.84153
AAEL004591-RA	1.41288	1.78766	-0.179114
AAEL012853-RA	1.54638	1.57146	0.880474
AAEL013032-RA	2.22235	1.87191	0.946154
AAEL002655-RA	2.37337	4.75237	2.95338
AAEL015631-RA	1.01444	0.912374	1.65247
AAEL000636-RA	1.13487	3.02311	1.74919
AAEL007557-RA	1.01868	0.905182	1.65604
AAEL008596-RA	1.03534	1.22663	0.985118
AAEL000277-RA	2.38876	2.15358	0.443582
AAEL002130-RA	1.17537	1.43317	-0.257113
AAEL010139-RA	4.53205	5.08818	6.24648
AAEL012506-RA	2.06575	2.16188	2.67053
AAEL003029-RA	2.96383	5.35887	2.71767
AAEL011616-RA	1.55483	1.64783	0.714225
AAEL003631-RA	2.46323	2.12866	0.745591
AAEL002969-RA	1.6777	1.99005	1.44295
AAEL005431-RA	3.13393	2.1221	1.18697
AAEL009915-RA	2.22409	2.25029	0.52394
AAEL010485-RA	1.05893	0.960741	1.72623
AAEL014349-RA	2.63547	1.7309	0.676776
AAEL012909-RA	2.12047	2.00429	-1.02202
AAEL008080-RA	3.30331	3.66322	2.84871
AAEL007626-RA	1.75621	0.990534	1.0885
AAEL011408-RA	1.03935	3.06676	1.03531
AAEL014387-RA	1.5811	1.59123	0.756503
AAEL014390-RA	2.81082	2.967	1.41448
AAEL002590-RA	1.57488	1.37846	0.845837
AAEL003114-RA	1.28294	3.18666	1.5038
AAEL016980-RA	1.36142	-0.105101	0.778796
AAEL014138-RA	2.31351	2.46534	1.9016
AAEL010056-RA	1.08188	0.934253	0.653595
AAEL011455-RA	2.89113	2.63387	0.934919
AAEL017469-RA	1.18302	-0.109985	0.467225
AAEL006168-RA	1.24007	2.07677	1.2535
AAEL003626-RA	2.48254	0.414138	2.60931
AAEL008404-RA	1.79768	3.11163	1.29718
AAEL006131-RA	2.02258	1.9891	0.921847
AAEL010527-RA	2.07663	2.06538	0.835974
AAEL002767-RA	1.04172	1.46137	0.373832
AAEL002481-RA	1.04095	2.34345	1.58874
AAEL011453-RA	1.48308	2.299	2.0983
AAEL008532-RA	3.8342	3.74009	0.444708
AAEL000851-RA	1.21677	0.211764	1.8738
AAEL013262-RA	1.16872	2.5281	2.29518
AAEL002959-RA	2.37927	2.86017	0.990136
AAEL014660-RA	1.96599	3.78192	2.37755
AAEL013245-RA	2.32291	3.23014	1.53396
AAEL017265-RA	1.50277	1.99024	0.773499
AAEL003294-RA	1.86907	3.02247	2.21542
AAEL008050-RA	3.32743	5.16347	4.4437
AAEL014139-RA	1.24659	3.11713	1.51108
AAEL011446-RA	2.50797	2.3857	0.97759
AAEL011610-RA	2.97691	3.2273	1.48365
AAEL009474-RA	1.66263	0.951149	0.870668
AAEL007109-RA	1.12316	1.58662	1.19572
AAEL008097-RA	1.20896	0.73116	0.843538
AAEL000374-RA	2.07283	4.82233	2.62668
AAEL014382-RA	2.25272	2.24017	1.16542
AAEL007969-RA	1.3305	2.15608	1.45535
AAEL014451-RA	1.83807	1.80492	0.845999
AAEL003857-RA	3.43228	5.54086	5.72984
AAEL003841-RA	4.29306	5.57383	5.73703
AAEL003319-RA	1.40644	5.1206	1.96611
AAEL012302-RA	2.1138	1.98222	0.816848
AAEL005641-RA	1.77525	3.66438	1.35253
AAEL012194-RA	2.41074	6.06157	3.86861
AAEL017139-RA	1.46747	1.4221	-0.353973
AAEL000543-RA	1.33412	1.6068	1.29499
AAEL013525-RA	2.41738	2.09273	0.734012
AAEL005793-RA	1.57782	3.07982	1.82302
AAEL007969-RB	1.3344	2.16519	1.43934
AAEL012842-RA	1.85811	3.19747	1.41944
AAEL007992-RA	3.44768	3.15779	2.27513
AAEL014353-RA	2.80215	2.67953	0.240518
AAEL008606-RA	2.23834	1.43799	0.512676
AAEL017309-RA	1.11428	1.55298	0.372277
AAEL017039-RA	1.12334	1.55955	0.374025
AAEL008292-RA	1.33418	3.39253	2.72314
AAEL014754-RA	2.41174	1.48558	0.555765
AAEL010980-RA	1.10826	2.42796	1.53043
AAEL008876-RA	3.07936	3.0365	-0.02751
AAEL011144-RA	1.31577	1.98174	1.28776
AAEL017003-RA	1.94259	2.36216	1.47912
AAEL002524-RA	1.52142	2.06361	0.577099
AAEL017555-RA	1.92929	2.36017	1.47468
AAEL005194-RA	1.20638	2.41261	1.33252
AAEL017003-RB	1.91567	2.32418	1.45697
AAEL013304-RA	1.42085	1.30639	-0.298272
AAEL002702-RA	2.77696	2.56135	0.795888
AAEL005792-RA	3.7214	4.38394	4.1664
AAEL012184-RA	2.9118	2.66097	0.990142
AAEL017484-RA	1.17638	5.72788	3.07738
AAEL010099-RA	1.14189	1.34445	1.09406
AAEL005337-RA	2.25668	2.05419	0.108585
AAEL003723-RA	1.20043	1.77405	1.14342
AAEL005800-RA	2.62247	3.20803	1.62365
AAEL005338-RA	1.25872	1.82835	-0.476537
AAEL001565-RA	1.28081	0.886169	0.782703
AAEL008222-RA	1.67537	1.71703	1.38027
AAEL014617-RA	2.20371	2.00607	1.6187
AAEL009459-RA	1.36376	3.73296	2.3346
AAEL017046-RA	1.00664	2.08585	1.43314
AAEL006259-RA	2.10603	9.30823	3.77067
AAEL017868-RA	2.68631	2.63933	0.695033
AAEL017590-RA	2.68631	2.63933	0.695033
AAEL002492-RA	2.13904	4.61915	2.50518
AAEL005253-RA	1.88445	3.71585	1.41121
AAEL012036-RA	2.7258	2.24163	0.550984
AAEL006723-RA	2.49065	2.95994	1.57568
AAEL011407-RA	2.4076	3.40965	1.07406
AAEL010270-RA	2.17904	-0.469416	-0.246981

## Sheet: iKR_iHairy_UP
Transcript_ID	Log(iKr-h1.1/iLuc.1, 2)	Log(iMet/iLuc, 2)	Log(iHairy/iLuc, 2)
AAEL006576-RA	1.63276	4.1221	1.51974
AAEL006576-RB	1.63573	4.11206	1.51205
AAEL014005-RA	1.64955	4.13095	1.57344
AAEL001964-RA	1.07534	3.6049	1.87
AAEL002610-RA	2.0731	3.87602	1.65892
AAEL014078-RA	1.20948	2.47147	1.03084
AAEL005673-RA	1.20188	2.46364	1.0227
AAEL006585-RA	3.17923	6.76016	2.92024
AAEL001794-RA	2.20833	2.33083	1.10442
AAEL017144-RA	2.70578	4.4084	2.20628
AAEL001794-RB	2.20203	2.32333	1.10213
AAEL015458-RA	1.74018	3.10174	1.11333
AAEL801283-RA	1.8031	3.26015	1.76587
AAEL801284-RA	1.72655	2.44501	1.32569
AAEL014004-RA	3.1996	6.74778	2.91964
AAEL001802-RA	2.23005	2.33052	1.12641
AAEL003686-RA	1.1326	2.1095	1.05139
AAEL017023-RA	1.80799	2.61733	1.33463
AAEL017023-RB	1.80668	2.61583	1.33496
AAEL014980-RA	1.12156	2.0906	1.0484
AAEL008473-RA	2.03716	3.68492	1.72279
AAEL015639-RA	1.75275	3.11423	1.12924
AAEL003619-RA	2.23809	7.16004	4.45432
AAEL003619-RB	2.25231	7.1639	4.46305
AAEL008274-RA	1.11855	2.67774	1.28619
AAEL017345-RA	1.56086	2.75831	1.49047
AAEL007371-RA	1.34788	2.95679	1.16343
AAEL008106-RA	2.13961	3.83882	1.71861
AAEL002406-RA	3.14009	4.30773	2.75153
AAEL013984-RA	1.17374	1.85798	1.04062
AAEL000059-RA	1.59304	2.54858	1.02322
AAEL002624-RA	1.73923	3.03954	1.07335
AAEL004809-RA	1.16847	3.24338	1.50513
AAEL002301-RA	1.26544	1.74664	1.03851
AAEL013895-RA	1.16795	3.22041	1.49233
AAEL012505-RA	2.04729	2.16461	2.756
AAEL002601-RA	1.23401	2.48824	1.28805
AAEL002559-RA	2.51217	3.03631	1.29392
AAEL005004-RA	1.86434	4.54147	2.09055
AAEL002585-RA	1.7496	3.34784	1.23361
AAEL015527-RA	1.44475	2.82012	1.14781
AAEL002580-RA	1.22523	2.43225	1.19481
AAEL000019-RA	1.40708	4.72716	1.86966
AAEL009423-RA	1.00845	2.68853	1.24362
AAEL000087-RA	1.99638	2.33585	1.93876
AAEL005482-RA	1.01739	2.225	1.92153
AAEL017132-RA	1.21412	3.86289	1.41683
AAEL007107-RA	1.4495	2.83458	1.14827
AAEL017380-RA	3.79137	5.50554	4.20031
AAEL012571-RA	1.84652	1.75791	1.05806
AAEL003614-RA	2.08512	3.21169	1.28432
AAEL014909-RA	1.85162	1.74949	1.06371
AAEL003656-RA	1.7285	2.96892	1.73871
AAEL008753-RA	1.53848	1.16365	1.16349
AAEL012956-RA	1.78635	2.62698	1.67403
AAEL008757-RA	2.1731	2.48944	1.28149
AAEL006518-RA	1.56136	2.75372	2.02736
AAEL001394-RA	1.2997	1.28587	1.40398
AAEL008646-RA	1.73067	3.18161	1.7319
AAEL003699-RA	1.88578	3.14602	1.67782
AAEL005748-RA	3.3002	3.96633	3.42219
AAEL006978-RA	1.58824	3.55465	1.77302
AAEL011884-RA	1.89124	3.75326	1.80809
AAEL002582-RA	1.38932	2.20659	1.41857
AAEL002022-RA	2.13676	6.91648	3.18079
AAEL010773-RA	1.65183	3.03439	1.09736
AAEL006662-RA	2.06574	2.18693	2.85016
AAEL015465-RA	2.06595	3.16981	1.22133
AAEL002582-RB	1.37247	2.21891	1.40286
AAEL006971-RA	4.16931	0.856393	3.19848
AAEL005093-RA	1.95263	3.08453	1.47284
AAEL007455-RA	1.11649	2.30669	1.04629
AAEL012353-RA	3.172	4.24178	1.84153
AAEL002655-RA	2.37337	4.75237	2.95338
AAEL015631-RA	1.01444	0.912374	1.65247
AAEL000636-RA	1.13487	3.02311	1.74919
AAEL007557-RA	1.01868	0.905182	1.65604
AAEL010139-RA	4.53205	5.08818	6.24648
AAEL012506-RA	2.06575	2.16188	2.67053
AAEL003029-RA	2.96383	5.35887	2.71767
AAEL002969-RA	1.6777	1.99005	1.44295
AAEL005431-RA	3.13393	2.1221	1.18697
AAEL010485-RA	1.05893	0.960741	1.72623
AAEL008080-RA	3.30331	3.66322	2.84871
AAEL007626-RA	1.75621	0.990534	1.0885
AAEL011408-RA	1.03935	3.06676	1.03531
AAEL014390-RA	2.81082	2.967	1.41448
AAEL003114-RA	1.28294	3.18666	1.5038
AAEL014138-RA	2.31351	2.46534	1.9016
AAEL006168-RA	1.24007	2.07677	1.2535
AAEL003626-RA	2.48254	0.414138	2.60931
AAEL008404-RA	1.79768	3.11163	1.29718
AAEL002481-RA	1.04095	2.34345	1.58874
AAEL011453-RA	1.48308	2.299	2.0983
AAEL000851-RA	1.21677	0.211764	1.8738
AAEL013262-RA	1.16872	2.5281	2.29518
AAEL014660-RA	1.96599	3.78192	2.37755
AAEL013245-RA	2.32291	3.23014	1.53396
AAEL003294-RA	1.86907	3.02247	2.21542
AAEL008050-RA	3.32743	5.16347	4.4437
AAEL014139-RA	1.24659	3.11713	1.51108
AAEL011610-RA	2.97691	3.2273	1.48365
AAEL007109-RA	1.12316	1.58662	1.19572
AAEL000374-RA	2.07283	4.82233	2.62668
AAEL014382-RA	2.25272	2.24017	1.16542
AAEL007969-RA	1.3305	2.15608	1.45535
AAEL003857-RA	3.43228	5.54086	5.72984
AAEL003841-RA	4.29306	5.57383	5.73703
AAEL003319-RA	1.40644	5.1206	1.96611
AAEL005641-RA	1.77525	3.66438	1.35253
AAEL012194-RA	2.41074	6.06157	3.86861
AAEL000543-RA	1.33412	1.6068	1.29499
AAEL005793-RA	1.57782	3.07982	1.82302
AAEL007969-RB	1.3344	2.16519	1.43934
AAEL012842-RA	1.85811	3.19747	1.41944
AAEL007992-RA	3.44768	3.15779	2.27513
AAEL008292-RA	1.33418	3.39253	2.72314
AAEL010980-RA	1.10826	2.42796	1.53043
AAEL011144-RA	1.31577	1.98174	1.28776
AAEL017003-RA	1.94259	2.36216	1.47912
AAEL017555-RA	1.92929	2.36017	1.47468
AAEL005194-RA	1.20638	2.41261	1.33252
AAEL017003-RB	1.91567	2.32418	1.45697
AAEL005792-RA	3.7214	4.38394	4.1664
AAEL017484-RA	1.17638	5.72788	3.07738
AAEL010099-RA	1.14189	1.34445	1.09406
AAEL003723-RA	1.20043	1.77405	1.14342
AAEL005800-RA	2.62247	3.20803	1.62365
AAEL008222-RA	1.67537	1.71703	1.38027
AAEL014617-RA	2.20371	2.00607	1.6187
AAEL009459-RA	1.36376	3.73296	2.3346
AAEL017046-RA	1.00664	2.08585	1.43314
AAEL006259-RA	2.10603	9.30823	3.77067
AAEL002492-RA	2.13904	4.61915	2.50518
AAEL005253-RA	1.88445	3.71585	1.41121
AAEL006723-RA	2.49065	2.95994	1.57568
AAEL011407-RA	2.4076	3.40965	1.07406

## Sheet: iKR_iHairy_iMET_UP
Transcript_ID	Log(iKr-h1.1/iLuc.1, 2)	Log(iMet/iLuc, 2)	Log(iHairy/iLuc, 2)
AAEL006576-RA	1.63276	4.1221	1.51974
AAEL006576-RB	1.63573	4.11206	1.51205
AAEL014005-RA	1.64955	4.13095	1.57344
AAEL001964-RA	1.07534	3.6049	1.87
AAEL002610-RA	2.0731	3.87602	1.65892
AAEL014078-RA	1.20948	2.47147	1.03084
AAEL005673-RA	1.20188	2.46364	1.0227
AAEL006585-RA	3.17923	6.76016	2.92024
AAEL001794-RA	2.20833	2.33083	1.10442
AAEL017144-RA	2.70578	4.4084	2.20628
AAEL001794-RB	2.20203	2.32333	1.10213
AAEL015458-RA	1.74018	3.10174	1.11333
AAEL801283-RA	1.8031	3.26015	1.76587
AAEL801284-RA	1.72655	2.44501	1.32569
AAEL014004-RA	3.1996	6.74778	2.91964
AAEL001802-RA	2.23005	2.33052	1.12641
AAEL003686-RA	1.1326	2.1095	1.05139
AAEL017023-RA	1.80799	2.61733	1.33463
AAEL017023-RB	1.80668	2.61583	1.33496
AAEL014980-RA	1.12156	2.0906	1.0484
AAEL008473-RA	2.03716	3.68492	1.72279
AAEL015639-RA	1.75275	3.11423	1.12924
AAEL003619-RA	2.23809	7.16004	4.45432
AAEL003619-RB	2.25231	7.1639	4.46305
AAEL008274-RA	1.11855	2.67774	1.28619
AAEL017345-RA	1.56086	2.75831	1.49047
AAEL007371-RA	1.34788	2.95679	1.16343
AAEL008106-RA	2.13961	3.83882	1.71861
AAEL002406-RA	3.14009	4.30773	2.75153
AAEL013984-RA	1.17374	1.85798	1.04062
AAEL000059-RA	1.59304	2.54858	1.02322
AAEL002624-RA	1.73923	3.03954	1.07335
AAEL004809-RA	1.16847	3.24338	1.50513
AAEL002301-RA	1.26544	1.74664	1.03851
AAEL013895-RA	1.16795	3.22041	1.49233
AAEL012505-RA	2.04729	2.16461	2.756
AAEL002601-RA	1.23401	2.48824	1.28805
AAEL002559-RA	2.51217	3.03631	1.29392
AAEL005004-RA	1.86434	4.54147	2.09055
AAEL002585-RA	1.7496	3.34784	1.23361
AAEL015527-RA	1.44475	2.82012	1.14781
AAEL002580-RA	1.22523	2.43225	1.19481
AAEL000019-RA	1.40708	4.72716	1.86966
AAEL009423-RA	1.00845	2.68853	1.24362
AAEL000087-RA	1.99638	2.33585	1.93876
AAEL005482-RA	1.01739	2.225	1.92153
AAEL017132-RA	1.21412	3.86289	1.41683
AAEL007107-RA	1.4495	2.83458	1.14827
AAEL017380-RA	3.79137	5.50554	4.20031
AAEL012571-RA	1.84652	1.75791	1.05806
AAEL003614-RA	2.08512	3.21169	1.28432
AAEL014909-RA	1.85162	1.74949	1.06371
AAEL003656-RA	1.7285	2.96892	1.73871
AAEL008753-RA	1.53848	1.16365	1.16349
AAEL012956-RA	1.78635	2.62698	1.67403
AAEL008757-RA	2.1731	2.48944	1.28149
AAEL006518-RA	1.56136	2.75372	2.02736
AAEL001394-RA	1.2997	1.28587	1.40398
AAEL008646-RA	1.73067	3.18161	1.7319
AAEL003699-RA	1.88578	3.14602	1.67782
AAEL005748-RA	3.3002	3.96633	3.42219
AAEL006978-RA	1.58824	3.55465	1.77302
AAEL011884-RA	1.89124	3.75326	1.80809
AAEL002582-RA	1.38932	2.20659	1.41857
AAEL002022-RA	2.13676	6.91648	3.18079
AAEL010773-RA	1.65183	3.03439	1.09736
AAEL006662-RA	2.06574	2.18693	2.85016
AAEL015465-RA	2.06595	3.16981	1.22133
AAEL002582-RB	1.37247	2.21891	1.40286
AAEL005093-RA	1.95263	3.08453	1.47284
AAEL007455-RA	1.11649	2.30669	1.04629
AAEL012353-RA	3.172	4.24178	1.84153
AAEL002655-RA	2.37337	4.75237	2.95338
AAEL000636-RA	1.13487	3.02311	1.74919
AAEL010139-RA	4.53205	5.08818	6.24648
AAEL012506-RA	2.06575	2.16188	2.67053
AAEL003029-RA	2.96383	5.35887	2.71767
AAEL002969-RA	1.6777	1.99005	1.44295
AAEL005431-RA	3.13393	2.1221	1.18697
AAEL008080-RA	3.30331	3.66322	2.84871
AAEL011408-RA	1.03935	3.06676	1.03531
AAEL014390-RA	2.81082	2.967	1.41448
AAEL003114-RA	1.28294	3.18666	1.5038
AAEL014138-RA	2.31351	2.46534	1.9016
AAEL006168-RA	1.24007	2.07677	1.2535
AAEL008404-RA	1.79768	3.11163	1.29718
AAEL002481-RA	1.04095	2.34345	1.58874
AAEL011453-RA	1.48308	2.299	2.0983
AAEL013262-RA	1.16872	2.5281	2.29518
AAEL014660-RA	1.96599	3.78192	2.37755
AAEL013245-RA	2.32291	3.23014	1.53396
AAEL003294-RA	1.86907	3.02247	2.21542
AAEL008050-RA	3.32743	5.16347	4.4437
AAEL014139-RA	1.24659	3.11713	1.51108
AAEL011610-RA	2.97691	3.2273	1.48365
AAEL007109-RA	1.12316	1.58662	1.19572
AAEL000374-RA	2.07283	4.82233	2.62668
AAEL014382-RA	2.25272	2.24017	1.16542
AAEL007969-RA	1.3305	2.15608	1.45535
AAEL003857-RA	3.43228	5.54086	5.72984
AAEL003841-RA	4.29306	5.57383	5.73703
AAEL003319-RA	1.40644	5.1206	1.96611
AAEL005641-RA	1.77525	3.66438	1.35253
AAEL012194-RA	2.41074	6.06157	3.86861
AAEL000543-RA	1.33412	1.6068	1.29499
AAEL005793-RA	1.57782	3.07982	1.82302
AAEL007969-RB	1.3344	2.16519	1.43934
AAEL012842-RA	1.85811	3.19747	1.41944
AAEL007992-RA	3.44768	3.15779	2.27513
AAEL008292-RA	1.33418	3.39253	2.72314
AAEL010980-RA	1.10826	2.42796	1.53043
AAEL011144-RA	1.31577	1.98174	1.28776
AAEL017003-RA	1.94259	2.36216	1.47912
AAEL017555-RA	1.92929	2.36017	1.47468
AAEL005194-RA	1.20638	2.41261	1.33252
AAEL017003-RB	1.91567	2.32418	1.45697
AAEL005792-RA	3.7214	4.38394	4.1664
AAEL017484-RA	1.17638	5.72788	3.07738
AAEL010099-RA	1.14189	1.34445	1.09406
AAEL003723-RA	1.20043	1.77405	1.14342
AAEL005800-RA	2.62247	3.20803	1.62365
AAEL008222-RA	1.67537	1.71703	1.38027
AAEL014617-RA	2.20371	2.00607	1.6187
AAEL009459-RA	1.36376	3.73296	2.3346
AAEL017046-RA	1.00664	2.08585	1.43314
AAEL006259-RA	2.10603	9.30823	3.77067
AAEL002492-RA	2.13904	4.61915	2.50518
AAEL005253-RA	1.88445	3.71585	1.41121
AAEL006723-RA	2.49065	2.95994	1.57568
AAEL011407-RA	2.4076	3.40965	1.07406
