# Supplementary material for: Synergistic action of the transcription factors Krüppel homolog 1 and Hairy in juvenile hormone/Methoprene-tolerant-mediated gene-repression in the mosquito Aedes aegypti
Source: PLoS Genet. 2019 Oct 29;15(10):e1008443. doi: 10.1371/journal.pgen.1008443 (PMC6818763; doi:10.1371/journal.pgen.1008443)
Supplement: S3 Table — (XLSX) [file pgen.1008443.s012.xlsx]

## Sheet: Sheet1
List of Primers Used
Primers for Q-PCR
Target_ID	Direction	Primer Sequence	Descriptors
AAEL002390	Forward	CAGGTCGTCAATCTGAGCAA	Kr-h1
	Reverse	GGTCTGGTGGAAGTTCGTGT
AAEL001746	Forward	TCACTTTCATCGGGGAGTTC	Met
	Reverse	GAGGAGAAAGCGGAGGAAGT
AAEL005480	Forward	CAAGTGCACATTTTGCCATC	Hairy
	Reverse	GGATCAACTGAACGCTGGAT
AAEL005093	Forward	GAAGTTATGGTTGCGGAGGA	Clip-Domain Serine Protease
	Reverse	TTCTAACACGCAAAGCATCG
AAEL006978	Forward	GATGTTGTAGACGCCCCCTC	protein-glutamine gamma-glutamyltransferase
	Reverse	AGCTCGTACCGCTTCGTATG
Primers for RNAi
Target_ID	Direction	Primer Sequence	Descriptors
AAEL002390	Forward	TAATACGACTCACTATAGGGCGCTTACCCAGCTATGCTTC	Kr-h1
	Reverse	TAATACGACTCACTATAGGGCTCTTGAACGTTTCATCGCA
AAEL001746	Forward	TAATACGACTCACTATAGGGTCAATTTGTTCGACTCTGCG	Met
	Reverse	TAATACGACTCACTATAGGGATACACAAAGTCGCCCGTTC
AAEL005480	Forward	TAATACGACTCACTATAGGGTGACCGTGAAACATTTGGAA	Hairy
	Reverse	TAATACGACTCACTATAGGGCGGTCTCCAAGGTTTGTCAT
Primers for Cell Culture Luciferase assay
Target_ID	Direction	Primer Sequence	Descriptors
AAEL005093	Forward	GCATGCTAGCTCTTACGTAATTAATTATCG	AAEL0050931KB-Luc
	Reverse	GCATCTCGAGTTGTTTCATTCATCGAAGG
AAEL005093	Forward	GCATGAATTCTTGCTCAAATTTTTTTAATTTATGG	AAEL0050931KBΔKBS-Luc
	Reverse	GCATGAATTCTTCAAAAGTGCAGTAGAATCG
AAEL005093	Forward	GCATATCGATATTCTAACGCACTGAGCG	AAEL0050931KBΔHBS-Luc
	Reverse	GCATATCGATCACATATTTGGTCACTGAG
AAEL002390	Forward	GGGGTACCCCATGGATTACAAGGATGACGACGATAAGGTGTACTATACGGGATTACCG	Kr-h1-Myc
	Reverse	GCTCTAGAGCTTAGGATGCCTTGGCGTACTGAATGGGAG
AAEL006978	Forward	ATATGCTAGCGACGGACCACACAGTGTC	AAEL0069781KB-Luc
	Reverse	ATCTAAGCTTCACCAGCCAGCACTCGT
AAEL006978	Forward	ATATGAATTCAGTGCCCTTCCTTAAATGC	AAEL0069781KBΔKBS-Luc
	Reverse	ATATGAATTCACTACCATCAAGAAGAGGCC
AAEL006978	Forward	ATGCCATATGATCGAATAATTTAACTAAGAC	AAEL0069781KBΔHBS-Luc
	Reverse	ATGCCATATGAATTTGGTCATAACAATTAC
Primers for ChIP
Target_ID	Direction	Primer Sequence	Descriptors
AAEL005093	Forward	TGTCGATTCTACTGCACTTT	Primers targetting the KBS
	Reverse	GCCAGTAAAGAATCAAGGGT
AAEL005093	Forward	TCTCAGTGACCAAATATGTG	Primers targetting the HBS
	Reverse	ACCTACCTACACAAGTCGA
pGL3 Basic	Forward	TGGGCTGAATACAAATCACA	Primers targetting the plasmid backbone (control)
	Reverse	CAACTCCGATAAATAACGCG
